# Supplementary material for: A translation proofreader of archaeal origin imparts multi-aldehyde stress tolerance to land plants
Source: eLife journal article supplement (doi:10.7554/elife.92827), 2023-11-24
Supplement: fig4-data2 [file elife-92827-fig4-data2-v1.pdf]

# MS

***Δ*dtd *E. coli***

***Δ*dtd *E. coli* + D-Tyr + Formaldehyde**

***Δ*dtd *E. coli* + D-Tyr + MG**

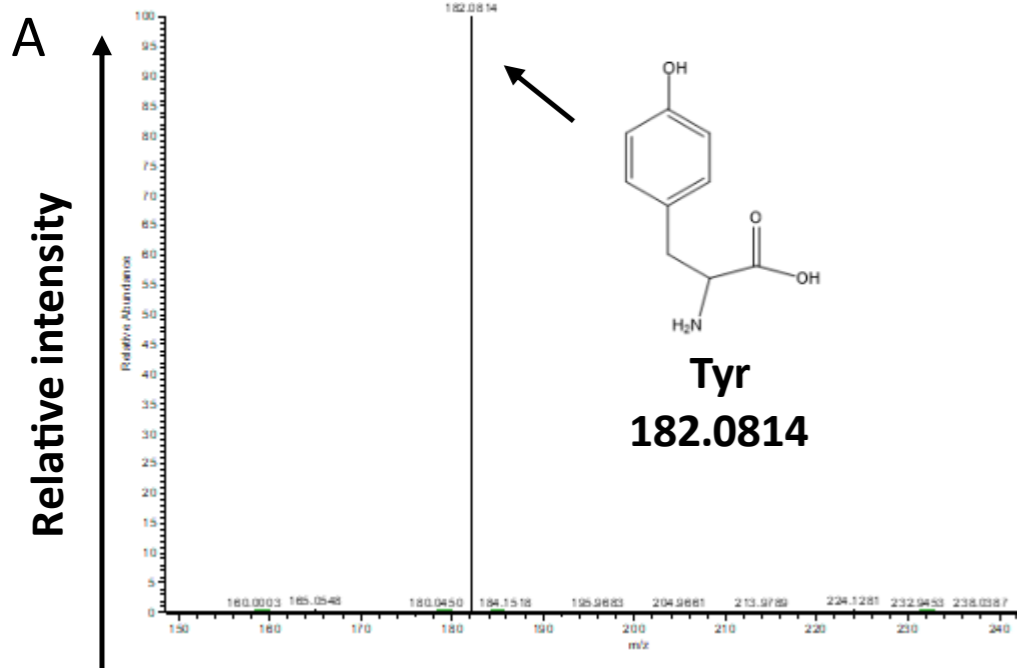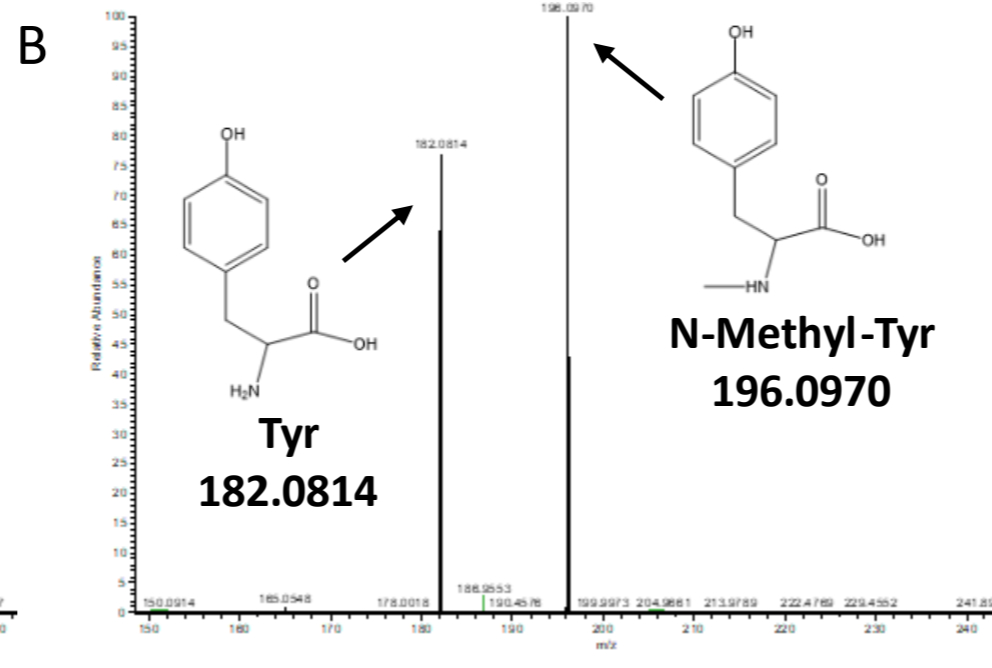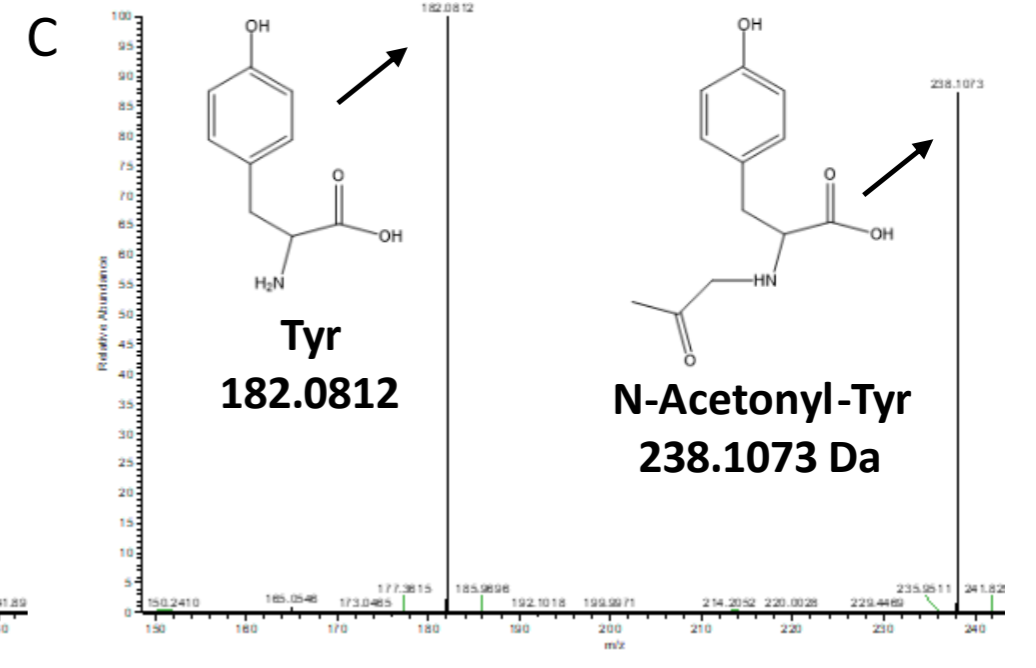

m/z  
MS/MS

***Δ*dtd *E. coli***

***Δ*dtd *E. coli* + D-Tyr + Formaldehyde**

***Δ*dtd *E. coli* + D-Tyr + MG**

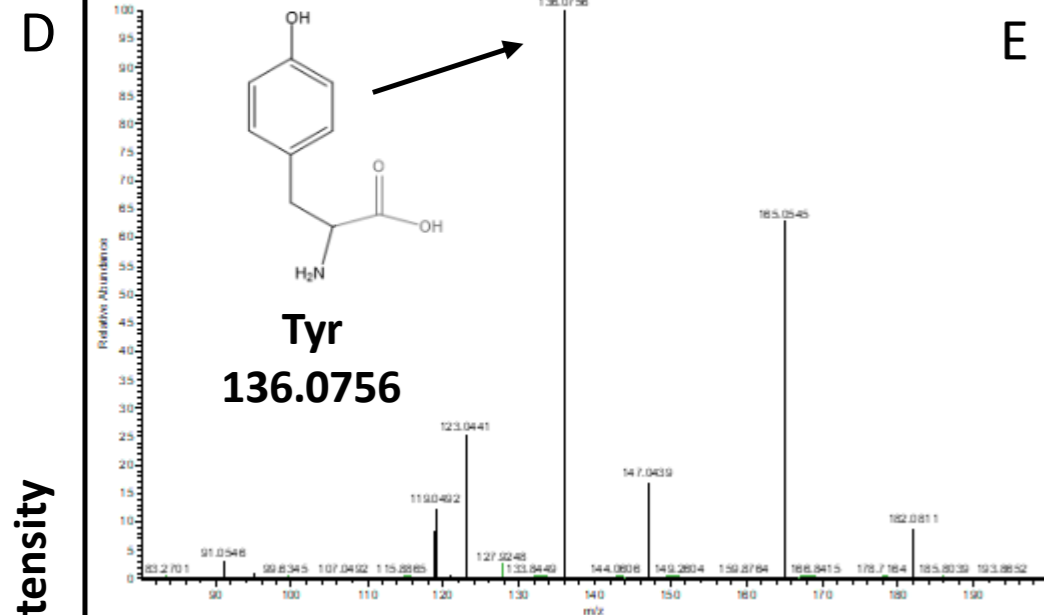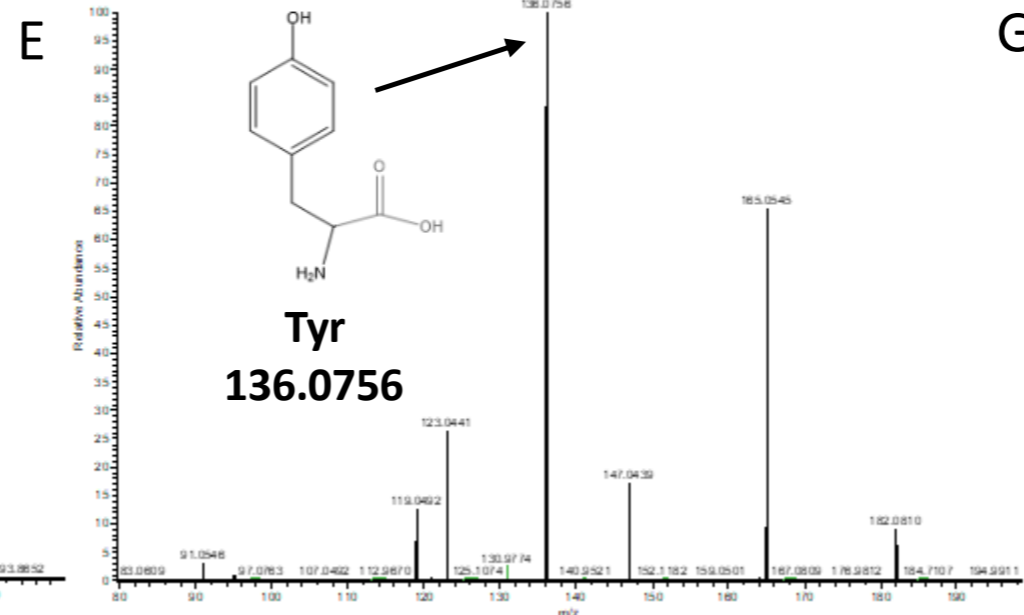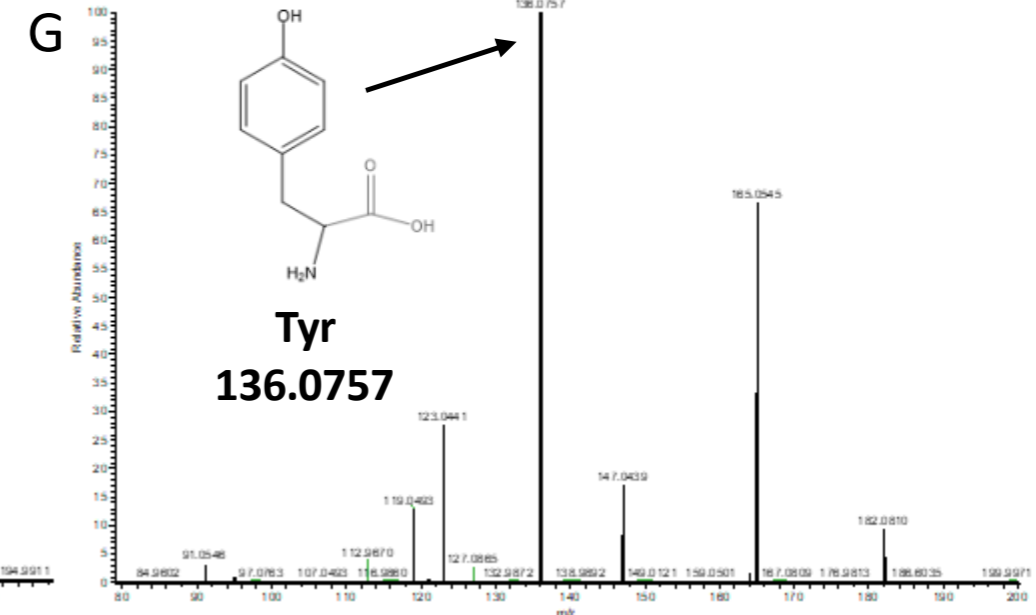

Relative intensity

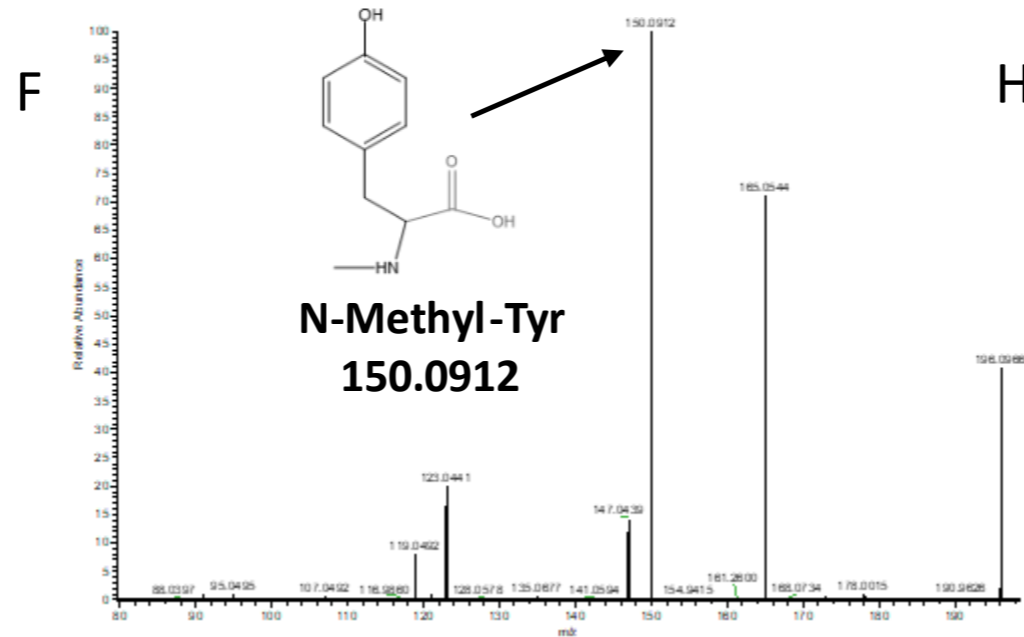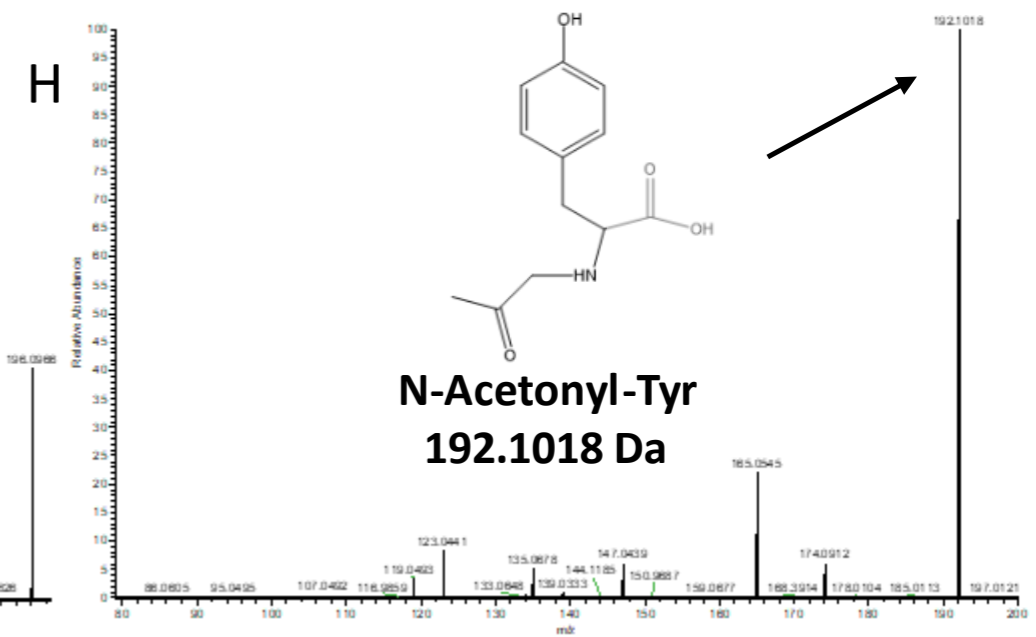

m/z
