# Supplementary material for: A translation proofreader of archaeal origin imparts multi-aldehyde stress tolerance to land plants
Source: eLife. 2024 Feb 19;12:RP92827. doi: 10.7554/eLife.92827 (PMC10942605; doi:10.7554/eLife.92827)
Supplement: Figure 1—source data 1. [file elife-92827-fig1-data1.xlsx]

## Sheet: Figure 1C-G
ESI-MS of Modified D-Phe-tRNAPhe
Figure	Aldehyde	Expected Mass	Observed Mass
2B	No	166.08	166.08
2C	Formaldehyde	180.1	180.1
2D	Propionaldehyde	208.13	208.13
2E	Butyraldehyde	222.14	222.14
2F	Methylglyoxal	222.08	222.08

## Sheet: Figure 1H
		Modification propensity of various aldehydes with Ala-tRNAAla
			20 mM		100 mM
			Set-1	Set-2	Set-1	Set-2
		No	0.302007	0.486709	1.16773	0.929734
		Formaldehyde	96.698	97.8136	98.1038	95.6996
		Acetaldehyde	85.8316	95.0395	97.3724	97.0485
		Propionaldehyde	28.2316	26.1619	63.9078	61.7045
		Butrylaldehyde	24.0401	32.4083	69.403	62.1173
		Valeraldehyde	15.2401	29.5994	60.2856	55.6893
		Isovaleraldehyde	6.16845	15.5433	50.1266	37.5977
		Decanal	1.85676	0.7302	1.17845	1.85818
		MG	99.3176	96.5952	98.1416	97.7119

## Sheet: Figure 1I
		Stability of formaldehyde modified D-Tyr-tRNATyr under 100 mM Tris pH 9.0
		Time (Min)	D-Tyr-tRNATyr			Methyl-D-Tyr-tRNATyr
		0	100	100	100	100	100	100
		2	20.8114	17.2844	19.5534	75.8028	78.0528	76.1096
		5	10.9978	8.3845	12.7522	63.919	65.0644	66.5167
		10	3.89254	4.29459	6.64839	49.4784	49.8261	50.6648
		15	0.950292	9.13743	5.97222	35.9378	35.7128	35.7128
		30	1.24269	6.45102	8.66228	19.1246	19.8609	17.8769
		60	1.00512	0.950292	5.31798	5.66578	5.21579	6.5044

## Sheet: Figure 1J
		Stability of methylglyoxal modified D-Tyr-tRNATyr under 200 mM Tris pH 9.0
		Time (Min)	D-Tyr-tRNATyr			MG-D-Tyr-tRNATyr
		0	100	100	100	100	100	100
		2	10.3729	3.49068	3.07418	85.8696	82.5718	84.9668
		5	1.11067	1.26934	0.912336	68.1835	71.2601	70.2837
		10	0.555335	1.0115	1.05117	60.5932	60.9433	56.3744
		15	0.694169	0.614835	1.0115	45.0811	49.65	41.7097
		30	0.654502	0.495835	0.416501	25.7738	27.4318	26.4554
		60	0.396668	0.614835	0.575169	11.5144	16.4886	12.7119
