# Supplementary material for: A translation proofreader of archaeal origin imparts multi-aldehyde stress tolerance to land plants
Source: eLife. 2024 Feb 19;12:RP92827. doi: 10.7554/eLife.92827 (PMC10942605; doi:10.7554/eLife.92827)
Supplement: Figure 1—source data 2. [file elife-92827-fig1-data2.xlsx]

## Sheet: Figure 1 - supplement figure 1
ESI-MS/MS of Modified D-Phe-tRNAPhe
Figure	Aldehyde	Expected Mass for MS2 D-Phe	Observed Mass for MS2 D-Phe
2C	No	120.08	120.08
2D	Formaldehyde	134.09	134.09
2E	Propionaldehyde	162.12	162.12
2F	Butyraldehyde	176.14	176.14
2G	Methylglyoxal	177.05	177.05
