# Supplementary material for: A translation proofreader of archaeal origin imparts multi-aldehyde stress tolerance to land plants
Source: eLife. 2024 Feb 19;12:RP92827. doi: 10.7554/eLife.92827 (PMC10942605; doi:10.7554/eLife.92827)
Supplement: Figure 3—source data 1. [file elife-92827-fig3-data1.xlsx]

## Sheet: Figure 3A
Deacylation of N-methyl-D-Tyr-tRNATyr with At DTD2
Time	Buffer			AtDTD2 50 pM			AtDTD2 500 pM			AtDTD2 5 nM
0	100	100	100	100	100	100	100	100	100	100	100	100
2	100	102.676	100	56.6422	50.5894	56.7378	44.6002	44.3453	41.9879	13.3163	20.2612	22.7461
5	100.56	100.573	98.8672	28.0663	28.6397	30.8697	25.4858	20.8984	13.2845	12.5518	15.0685	12.9659
10	97.1366	95.7948	100.472	17.6808	12.2969	13.6031	24.1797	17.1074	17.0436	9.78018	12.9659	6.75374
15	96.6075	97.8656	100.504	15.8012	15.5782	13.8579	8.37846	8.44218	9.23861	6.37146	5.54317	6.49888

## Sheet: Figure 3B
Deacylation of N-propyl-D-Tyr-tRNATyr with At DTD2
Time	Buffer			AtDTD2 500 nM
0	100	100	100	100	100	100
2	100	96.3398	91.1335	55.4025	40.8093	44.124
5	98.3882	87.9113	86.8464	41.412	30.8653	21.1795
10	98.086	92.1424	84.508	39.9483	22.3849	18.5966
15	85.3593	85.9637	86.4566	20.706	29.1434	17.6926

## Sheet: Figure  3C
Deacylation of N-acetonyl-D-Tyr-tRNATyr with At DTD2
Time	Buffer			AtDTD2 5 nM			AtDTD2 50 nM
0	100	100	100	100	100	100	100	100	100
2	90.9545	98.0016	94.478	42.4154	29.224	24.8716	13.3897	6.85531	10.2684
5	92.2693	96.5554	94.4123	26.9545	10.9685	11.0852	6.12602	3.9965	1.31272
10	93.8207	88.2461	91.0334	16.3944	10.881	11.4703	12.8355	7.87631	9.8308
15	92.3482	85.4588	88.9035	14.6149	8.72229	12.2579	8.8098	9.85998	14.0607

## Sheet: Figure 3D
Deacylation of N-butryl-D-Tyr-tRNATyr with At DTD2
Time	Buffer			AtDTD2 500 nM
0	100	100	100	100	100	100
2	100	102.352	99.7906	90.3328	90.6483	89.7304
5	97.5904	99.4836	96.5301	83.2473	88.2674	89.759
10	96.5003	93.1153	92.9106	76.3052	92.1687	90.677
15	92.3121	89.8164	89.0817	82.9891	92.8858	87.3781

## Sheet: Figure 3E
Deacylation of N-methyl-D-Tyr-tRNATyr with Pho DTD2
Time	Buffer			PhoDTD2 50 pM			PhoDTD2 500 pM			PhoDTD2 5 nM
0	100	100	100	100	100	100	100	100	100	100	100	100
2	100	102.676	100	66.8345	64.7262	58.4959	49.7797	52.3285	53.2096	21.5859	25.4248	23.5683
5	100.56	100.573	98.8672	45.1857	32.9453	38.0743	26.117	25.2675	28.068	14.2857	13.6564	13.9081
10	97.1366	95.7948	100.472	19.3203	28.6973	27.4386	15.6136	14.7011	20.2536	9.66016	11.1391	11.8313
15	96.6075	97.8656	100.504	15.8905	28.3197	23.6627	7.07992	11.202	11.4537	7.52045	6.13593	4.21649

## Sheet: Figure  3F
Deacylation of N-propyl-D-Tyr-tRNATyr with Pho DTD2
Time	Buffer			PhoDTD2 5 nM			PhoDTD2 50 nM			PhoDTD2 500 nM
0	100	100	100	100	100	100	100	100	100	100	100	100
2	100	96.3398	91.1335	87.1777	95.1607	98.1279	101.484	93.8891	87.107	53.5259	51.7797	46.9308
5	98.3882	87.9113	86.8464	83.7513	74.426	86.8244	81.8085	91.2045	84.3518	26.6286	26.8301	34.037
10	98.086	92.1424	84.508	90.9573	83.1861	82.1618	72.8718	70.0106	78.7001	24.9832	30.9604	23.644
15	85.3593	85.9637	86.4566	72.4126	71.7061	72.7305	63.2992	64.0763	73.9668	21.5245	21.9611	18.6424

## Sheet: Figure 3G
Deacylation of N-acetonyl-D-Tyr-tRNATyr with Pho DTD2
Time	Buffer			PhoDTD2 5 nM			PhoDTD2 50 nM
0	100	100	100	100	100	100	100	100	100
2	90.9545	98.0016	94.478	67.8238	53.9965	56.2719	11.7853	10.1809	16.8553
5	92.2693	96.5554	94.4123	42.4738	38.2147	29.4632	15.3734	7.3804	6.88448
10	93.8207	88.2461	91.0334	27.3629	27.6838	29.4341	13.3606	7.67211	5.2217
15	92.3482	85.4588	88.9035	26.7795	24.6791	14.119	12.077	12.0187	10.5893

## Sheet: Figure 3H
Deacylation of N-butryl-D-Tyr-tRNATyr with Pho DTD2
Time	Buffer			PhoDTD2 500 nM
0	100	100	100	100	100	100
2	100	102.352	99.7906	87.665	90.6483	85.7613
5	97.5904	99.4836	96.5301	86.8617	83.0465	79.659
10	96.5003	93.1153	92.9106	67.8141	69.0476	69.1594
15	92.3121	89.8164	89.0817	59.5812	64.2283	58.3308

## Sheet: Figure  3I
Deacylation of N-methyl-D-Tyr-tRNATyr with At DTD1
Time	Buffer			At DTD1 500 nM
0	100	100	100	100	100	100
2	97.063	100	102.335	107.396	95.5768	99.8585
5	96.6737	90.6582	97.3461	104.919	95.0814	97.523
10	96.6384	88.4643	85.5626	87.7919	84.2887	80.9271
15	95.6122	74.2038	75.2654	77.5655	76.7162	73.3192

## Sheet: Figure  3J
Deacylation of N-propyl-D-Tyr-tRNATyr with AtDTD1
Time	Buffer			AtDTD1 500 nM
0	100	100	100	100	100	100
2	100	96.3398	91.1335	89.4548	91.5865	91.6997
5	98.3882	87.9113	86.8464	90.9262	85.5122	89.568
10	98.086	92.1424	84.508	82.89	90.6433	87.0402
15	85.3593	85.9637	86.4566	79.7585	75.8536	74.0992

[truncated: 2 more sheets: Figure  3K, Figure 3L]
