# Supplementary material for: A translation proofreader of archaeal origin imparts multi-aldehyde stress tolerance to land plants
Source: eLife. 2024 Feb 19;12:RP92827. doi: 10.7554/eLife.92827 (PMC10942605; doi:10.7554/eLife.92827)
Supplement: Figure 3—source data 2. [file elife-92827-fig3-data2.xlsx]

## Sheet: Figure 3 - supplement figure 1A
Deacylation of N-valeryl-D-Tyr-tRNATyr with At DTD2
Time	Buffer			AtDTD2 500 nM
0	100	100	100	100	100	100
2	100	100.935	102.162	91.6479	85.2306	84.7146
5	96.4205	88.2941	101.016	84.4566	88.5521	93.4537
10	95.1306	86.456	105.144	83.9084	89.0036	89.6162
15	88.1006	84.5856	86.6645	80.7481	93.7762	75.524

## Sheet: Figure 3 - supplement figure 1B
Deacylation of N-Isovaleryl-D-Tyr-tRNATyr with At DTD2
Time	Buffer			AtDTD2 500 nM
0	100	100	100	100	100	100
2	87.2591	80.3775	95.7782	102.831	102.477	99.3708
5	96.3429	102.241	97.102	109.084	94.4947	86.2367
10	87.2198	83.9166	90.0537	87.4951	98.1125	103.382
15	90.641	80.1809	103.363	89.2647	91.978	101.18

## Sheet: Figure 3 - supplement figure 1C
Deacylation of N-valeryl-D-Tyr-tRNATyr with Pho DTD2
Time	Buffer			PhoDTD2 500 nM
0	100	100	100	100	100	100
2	100	100.935	102.162	83.2957	90.7449	91.2844
5	96.4205	88.2941	101.016	73.17	75.8787	82.0773
10	95.1306	86.456	105.144	87.1332	79.0713	73.7877
15	88.1006	84.5856	86.6645	75.1371	64.1406	58.3879

## Sheet: Figure 3 - supplement figure 1D
Deacylation of N-Isovaleryl-D-Tyr-tRNATyr with Pho DTD2
Time	Buffer			PhoDTD2 500 nM
0	100	100	100	100	100	100
2	87.2591	80.3775	95.7782	91.7814	94.2981	92.6297
5	96.3429	102.241	97.102	88.7534	92.1353	82.0751
10	87.2198	83.9166	90.0537	89.1073	89.2253	77.8175
15	90.641	80.1809	103.363	81.9111	91.1522	70.1968

## Sheet: Figure 3 - supplement figure 1E
Deacylation of N-valeryl-D-Tyr-tRNATyr with At DTD1
Time	Buffer			AtDTD1 500 nM
0	100	100	100	100	100	100
2	100	100.935	102.162	77.1847	75.5489	60.2238
5	96.4205	88.2941	101.016	49.0745	84.3306	62.2041
10	95.1306	86.456	105.144	75.678	70.5123	60.7835
15	88.1006	84.5856	86.6645	62.9359	65.9062	65.1743

## Sheet: Figure 3 - supplement figure 1F
Deacylation of N-Isovaleryl-D-Tyr-tRNATyr with AtDTD1
Time	Buffer			AtDTD1 500 nM
0	100	100	100	100	100	100
2	87.2591	80.3775	95.7782	98.7416	108.415	100.157
5	96.3429	102.241	97.102	110.381	103.854	81.7538
10	87.2198	83.9166	90.0537	105.545	101.652	82.5796
15	90.641	80.1809	103.363	84.4672	77.6248	90.9162
