# Supplementary material for: A translation proofreader of archaeal origin imparts multi-aldehyde stress tolerance to land plants
Source: eLife. 2024 Feb 19;12:RP92827. doi: 10.7554/eLife.92827 (PMC10942605; doi:10.7554/eLife.92827)
Supplement: Figure 3—source data 3. [file elife-92827-fig3-data3.xlsx]

## Sheet: Figure 3 - supplement figure 2A
Deacylation of N-methyl-L-Tyr-tRNATyr with At DTD2
Time	Buffer			AtDTD2 500 nM
0	100	100	100	100	100	100
2	98	100	99.5107	74.4343	76.1876	71.7431
5	98.5117	98.7972	95.6167	60.3058	61.2028	59.5515
10	87.788	99.55	99.96	53.476	55.8817	54.6177
15	87.9511	97.737	99.26	48.2773	53.3333	44.4648

## Sheet: Figure 3 - supplement figure 2B
Deacylation of N-propyl-L-Tyr-tRNATyr with At DTD2
Time	Buffer			AtDTD2 500 nM
0	100	100	100	100	100	100
2	98.2765	95.4299	96.9597	83.8497	88.962	86.3284
5	97.3858	95.4105	93.5322	70.5267	85.4957	75.0387
10	103.331	92.7188	90.2014	73.8575	75.6003	71.8435
15	95.5267	87.5097	85.67	66.5763	58.0751	60.1084

## Sheet: Figure 3 - supplement figure 2C
Deacylation of N-acetonyl-L-Tyr-tRNATyr with At DTD2
Time	Buffer			AtDTD2 500 nM
0	100	100	100	100	100	100
2	105.39	98.9755	102.628	98.7528	102.027	96.3697
5	105.858	102.138	100.044	95.1448	95.1002	96.1915
10	105.145	98.1292	102.004	99.7105	96.3697	96.882
15	104.655	102.316	98.441	92.8285	92.8062	98.3073

## Sheet: Figure 3 - supplement figure 2D
Deacylation of N-butryl-L-Tyr-tRNATyr with At DTD2
Time	Buffer			AtDTD2 500 nM
0	100	100	100	100	100	100
2	91.0625	92.4051	92.5969	74.1465	87.15	76.9467
5	94.323	101.228	90.4488	80.9743	85.9225	87.6103
10	97.6218	90.9858	91.4077	73.341	72.6122	77.2919
15	91.6379	89.4515	84.9636	60.1841	76.5247	63.6747

## Sheet: Figure 3 - supplement figure 2E
Deacylation of N-valeryl-L-Tyr-tRNATyr with At DTD2
Time	Buffer			AtDTD2 500 nM
0	100	100	100	100	100	100
2	103.068	97.5829	93.6783	81.9647	64.7041	86.9538
5	102.479	101.302	96.9012	89.5259	66.7803	85.9312
10	104.338	98.2956	100.465	58.5063	72.3892	77.9052
15	93.0276	91.6331	93.7713	60.3347	62.2869	60.6136

## Sheet: Figure 3 - supplement figure 2F
Deacylation of N-Isovaleryl-L-Tyr-tRNATyr with At DTD2
Time	Buffer			AtDTD2 500 nM
0	100	100	100	100	100	100
2	103.481	104.447	101.225	80.1482	86.4969	77.989
5	103.674	101.966	99.6133	87.6893	69.1266	76.99
10	106.832	110.119	107.38	83.0487	78.0857	79.4715
15	86.5614	96.4873	95.3271	68.2243	69.0944	61.3278

## Sheet: Figure 3 - supplement figure 2G
Deacylation of N-methyl-L-Tyr-tRNATyr with Pho DTD2
Time	Buffer			PhoDTD2 500 nM
0	100	100	100	100	100	100
2	98	100	99.5107	95.6371	88.0938	93.6188
5	98.5117	98.7972	95.6167	91.3761	79.4903	90.7237
10	87.788	99.55	99.96	81.9368	81.3048	85.158
15	87.9511	97.737	99.26	88.4608	78.7972	80.6116

## Sheet: Figure 3 - supplement figure 2H
Deacylation of N-propyl-L-Tyr-tRNATyr with Pho DTD2
Time	Buffer			PhoDTD2 500 nM
0	100	100	100	100	100	100
2	98.2765	95.4299	96.9597	90.8017	91.1503	91.7506
5	97.3858	95.4105	93.5322	84.5469	86.7738	86.4446
10	103.331	92.7188	90.2014	84.3338	76.7235	82.3974
15	95.5267	87.5097	85.67	80.6739	72.8311	73.2378

## Sheet: Figure 3 - supplement figure 2I
Deacylation of N-acetonyl-L-Tyr-tRNATyr with Pho DTD2
Time	Buffer			PhoDTD2 500 nM
0	100	100	100	100	100	100
2	105.39	98.9755	102.628	105.033	93.0289	101.114
5	105.858	102.138	100.044	96.9488	101.247	95.8797
10	105.145	98.1292	102.004	100.223	103.051	97.8842
15	104.655	102.316	98.441	93.8085	96.9711	96.4811

## Sheet: Figure 3 - supplement figure 2J
Deacylation of N-butryl-L-Tyr-tRNATyr with Pho DTD2
Time	Buffer			PhoDTD2 500 nM
0	100	100	100	100	100	100
2	91.0625	92.4051	92.5969	87.8788	92.6736	83.5059
5	94.323	101.228	90.4488	91.753	77.9824	85.3855
10	97.6218	90.9858	91.4077	73.9164	50.0959	65.8228
15	91.6379	89.4515	84.9636	74.6068	71.1162	76.6398

[truncated: 6 more sheets: Figure 3 - supplement figure 2K, Figure 3 - supplement figure 2L, Figure 3 - supplement figure 2M, Figure 3 - supplement figure 2N, Figure 3 - supplement figure 2O, Figure 3 - supplement figure 2P]
