# Supplementary material for: A translation proofreader of archaeal origin imparts multi-aldehyde stress tolerance to land plants
Source: eLife. 2024 Feb 19;12:RP92827. doi: 10.7554/eLife.92827 (PMC10942605; doi:10.7554/eLife.92827)
Supplement: Figure 4—source data 1. [file elife-92827-fig4-data1.xlsx]

## Sheet: Figure 4C-G
Seedling size (mm2)
Figure 1E: MSA					Figure 1F: MSA + 1.5 mM MG					Figure 1G: MSA + 0.5 mM D-Tyr + 1.5 mM MG					Figure 1H: MSA + 0.5 mM Formaldehyde					Figure 1I: MSA + 0.5 mM D-Tyr + 0.5 mM Formaldehyde
Col-0	dtd2(-/-)	dtd2(-/-) :: AtDTD2	Catalytic Mutant		Col-0	dtd2(-/-)	dtd2(-/-) :: AtDTD2	Catalytic Mutant		Col-0	dtd2(-/-)	dtd2(-/-) :: AtDTD2	Catalytic Mutant		Col-0	dtd2(-/-)	dtd2(-/-) :: AtDTD2	Catalytic Mutant		Col-0	dtd2(-/-)	dtd2(-/-) :: AtDTD2	Catalytic Mutant
2.55185	2.57879	2.8426	2.67916		0.842	0.433	1.132	0.085		0.787	0.076	1.164	0.02		1.1289	0.64766	1.20098	0.75		0.59	0.16	0.86	0.175
3.69216	2.59455	2.638	2.70149		1.159	0.425	0.929	0.148		0.74	0.081	0.784	0.016		1.00594	0.73776	1.6165	0.681		0.83	0.21	0.89	0.31
3.74327	2.90129	3.59549	2.55581		1.273	0.291	1.085	0.0991		0.973	0.0641	1.148	0.011		1.40662	0.76161	1.37906	0.753		0.51	0.19	0.62	0.28
3.27967	2.3424	2.85005	2.57007		0.852	0.314	0.914	0.156		0.744		0.523			1.34355	0.98421	1.07007	0.609		0.66	0.25	0.48	0.205
2.76698	2.67315	2.34012	2.75734		1.041	0.081	0.959					0.949			1.30645		1.20151			0.79	0.36	0.59	0.33
3.34293	2.30232	2.50288	2.79783		0.982	0.152	0.924								1.60484
2.81764	2.75018	3.39545	3.14892		0.939	0.354	0.775
2.82601	2.96418	2.68252	2.55691		0.81	0.134	0.862
2.99948	2.60803	2.95236	2.497		0.866	0.06	0.739
2.48113	2.87858	3.06683	2.15026		0.705	0.091
2.59943	2.47341	3.17827	2.2701		0.795
2.46196	2.26909	2.7986	2.68869		0.88
3.22902	3.02663	2.94907	2.6397		0.881
2.37268	2.52895	2.79494	3.24418
2.55298	2.78952	3.00722	3.28602
2.7338	2.72218	3.12508
2.67406	2.7616	2.4291
3.26859	2.8368
2.29246	2.48986
3.54923	2.59922
	2.80818
	2.51445
	2.73003

## Sheet: Figure 4H
	Germination percentage under formaldehyde treatment
	Col-0			dtd2 (-/-):: AtDTD2			dtd2 (-/-)			dtd2 (-/-):: AtDTD2 H150A
MSA	100	100	100	98	98	98	100	100	100	97	97	97
0.1% Ethanol	100	100	100	82	82	82	0	0	0	0	0	0
0.5 mM Formaldehyde	100	95	89	100	92	85	90	91	59	94	93	85
0.75 mM Formaldehyde	92	95	81	95	93	80	89	94	60	93	96	66
1.00 mM Formaldehyde	91	76	50	85	72	82	60	56	47	45	51	35
1.25 mM Formaldehyde	84	68	78	78	62	64	40	42	36	29	24	29
	Germination percentage under MG treatment
	Wt			dtd2 (-/-):: AtDTD2			dtd2 (-/-)			dtd2 (-/-):: AtDTD2 H150A
0	100	100	100	100	100	100	100	100	100	100	100	100
0.75	92	97	92	80	96	85	70	75	64	45	68	66
1	89.16	86.3	82.9	64	76	58	27	39	36	36	55	31
1.5	76	75	78	53	68	72	37	41	57	45	41	53
1.75	86	83	87	73	64	73	31	40	43	35	52	36
2	89	85	82	49	60	63	25	35	32	11	33	39
