# Supplementary material for: A translation proofreader of archaeal origin imparts multi-aldehyde stress tolerance to land plants
Source: eLife. 2024 Feb 19;12:RP92827. doi: 10.7554/eLife.92827 (PMC10942605; doi:10.7554/eLife.92827)
Supplement: Figure 4—source data 3. [file elife-92827-fig4-data3.xlsx]

## Sheet: Figure 4 - supplement figure 1D
	Deacylation of N-Ethyl-D-Tyr-tRNATyr with AtDTD2 and PhoDTD2
	Time	Buffer			Pho DTD2 500 pM			At DTD2 500 pM
	0	100	100	100	100	100	100	100	100	100
	2	94.0206	96.4327	89.6065	35.1203	25.5771	32.8384	57.5029	51.1774	51.7446
	5	92.142	88.8086	97.3769	24.2383	19.0021	21.6283	28.3391	23.9683	26.2806
	10	89.874	79.0394	95.6941	18.3963	14.5022	17.4957	17.1592	16.2276	17.6689
	15	84.7423	83.1895	93.6402	9.43872	13.01	14.2292	16.0138	12.9634	12.2494

## Sheet: Figure 4 - supplement figure 1E
	Deacylation of N-Ethyl-D-Tyr-tRNATyr with AtDTD2 H150A and PhoDTD2 H140A (catalytic mutants)
	Time	Buffer			PhoDTD2W H140A 500 nM			AtDTD2 H150A 500 nM
	0	100	100	100	100	100	100	100	100	100
	2	97.1429	96.1649	104.029	94.0364	93.4574	99.5971	89.1317	98.0114	80.567
	5	96.8169	96.8169	101.554	98.2742	92.4981	101.592	103.012	95.8653	90.6675
	10	94.094	90.8341	95.7406	108.591	93.1888	101.976	99.8031	97.6373	91.2975
	15	93.9022	98.6577	81.888	117.335	92.3254	111.454	98.5824	89.9193	66.3516

## Sheet: Figure 4 - supplement figure 1F
	Deacylation of N-Ethyl-L-Tyr-tRNATyr AtDTD2 H150A and PhoDTD2 H140A (catalytic mutants)
	Time	Buffer			PhoDTD2 H140A 500 nM			AtDTD2 H150A 500 nM
	0	100	100	100	100	100	100	100	100	100
	2	95.5971	101.134	104.838	97.5335	93.5969	96.1614	99.8961	112.158	100.935
	5	96.1829	97.9781	89.3424	90.3953	86.8344	91.016	95.4278	105.698	98.9955
	10	95.1436	93.8965	92.7627	72.0353	70.3528	75.5962	89.9896	100.502	95.8954
	15	88.0008	90.6651	90.9486	64.4887	56.8278	60.7481	93.2802	94.7004	76.4808
