# Supplementary material for: A translation proofreader of archaeal origin imparts multi-aldehyde stress tolerance to land plants
Source: eLife. 2024 Feb 19;12:RP92827. doi: 10.7554/eLife.92827 (PMC10942605; doi:10.7554/eLife.92827)
Supplement: Figure 5—source data 1. [file elife-92827-fig5-data1.xlsx]

## Sheet: Figure 5A
Seedling size (mm2)
MSA				MSA + 0.75 mM Formaldehyde			MSA + 1.0 mM Formaldehyde			MSA + D-Tyr				MSA + D-Tyr + 0.75 mM Formaldehyde			MSA + D-Tyr + 1.0 mM Formaldehyde
Col-0	DTD2 Overexpression line			Col-0	DTD2 Overexpression line		Col-0	DTD2 Overexpression line		Col-0	DTD2 Overexpression line			Col-0	DTD2 Overexpression line		Col-0	DTD2 Overexpression line
2.55465	2.5446			1.25708	1.90627		0.654672	1.70369		2.58075	2.11912			0.433151	1.76764		0.142088	1.10143
2.77562	2.31852			1.13055	2.21219		0.945444	1.76208		2.76084	2.3619			0.546185	1.46884		0.18876	0.89582
2.33433	2.60989			0.959702	3.2458		0.59162	1.53981		2.88931	2.86811			0.397981	1.34376		0.360971	0.972919
2.93827	2.65257			1.59201	2.51871		0.679306	2.10628		3.01505	1.64627			0.731911	1.71007		0.141245	0.738816
2.93055	2.37064			1.30702	2.15927		0.947644	1.37025		3.12761	2.60442			0.298588	1.27076		0.200218	0.825786
2.56382	3.86234			1.37789	1.98802			1.79009		2.60731	1.97348			0.309979	1.28044		0.312173	0.658831
3.49544	2.42861			1.17064	2.48829			1.81597		2.79768	2.10562			0.539627	1.37609		0.30304	0.86971
2.58291	2.18689				1.86694			1.42764		2.39539	3.10682			0.598178	1.303		0.427352	0.557615
3.04727	2.40323				1.89916					2.08128	2.54642			0.614373			0.416828	0.564685
2.8469	3.82129				3.12413					1.95878				0.820377				0.964652
2.57388	3.38608				1.90119					2.50786				0.802859				0.625789
3.12343	2.60939				2.57698					2.68687				0.552262				1.00057
	3.06987				2.2834									0.433653				0.76824
					2.10818													0.559091
					2.14614
