# Supplementary material for: A translation proofreader of archaeal origin imparts multi-aldehyde stress tolerance to land plants
Source: eLife. 2024 Feb 19;12:RP92827. doi: 10.7554/eLife.92827 (PMC10942605; doi:10.7554/eLife.92827)
Supplement: Figure 5—source data 2. [file elife-92827-fig5-data2.xlsx]

## Sheet: Figure 5C
	Relative expression q
	Col-0	DTD2 overexpression
	1	31.56
	1	28.38
	1	35.84
