# Supplementary material for: A translation proofreader of archaeal origin imparts multi-aldehyde stress tolerance to land plants
Source: eLife. 2024 Feb 19;12:RP92827. doi: 10.7554/eLife.92827 (PMC10942605; doi:10.7554/eLife.92827)
Supplement: Figure 5—source data 3. [file elife-92827-fig5-data3.xlsx]

## Sheet: Figure 5 - supplement figure 1D
Seedling size (mm2)
MSA + 0.5 mM Formaldehyde				MSA + 1.25 mM Formaldehyde				MSA + D-Tyr + 0.5 mM Formaldehyde
Col-0	DTD2 overexpression			Col-0	DTD2 overexpression			Col-0	DTD2 overexpression
2.3468	3.42592			0.891092	1.91144			1.09155	1.92672
2.2005	3.56632			0.937786	2.14169			0.94906	2.44547
2.27763	3.51039			0.662826	1.39007			0.766294	1.97059
2.25058	3.53415			0.780392	1.7273			1.32038	2.92954
0.930404	3.32825				1.55173			1.20862	2.43074
2.5635	3.32805							1.35712	2.24348
2.38838	3.54913							0.94326	1.77147
2.27701	2.96232							0.946422	2.34142
2.11241								1.00569	2.00064
2.22691								1.27228	2.01568
1.2039								1.29182	2.16202
1.88276								0.702575
2.3326								1.32381
2.39358								1.26314
								0.988613
