# Supplementary material for: A translation proofreader of archaeal origin imparts multi-aldehyde stress tolerance to land plants
Source: eLife. 2024 Feb 19;12:RP92827. doi: 10.7554/eLife.92827 (PMC10942605; doi:10.7554/eLife.92827)
Supplement: Figure 6—source data 1. [file elife-92827-fig6-data1.xlsx]

## Sheet: Figure  6A
Deacylation of N-methyl-D-Tyr-tRNATyr with Kn DTD2
Time	Buffer			KnDTD2 50 pM			KnDTD2 500 pM			KnDTD2 5 nM
0	100	100	100	100	100	100	100	100	100	100	100	100
2	100	102.676	100	67.756	60.3175	70.2147	45.8139	32.8354	26.0504	26.8596	24.7743	25.0545
5	100.56	100.573	98.8672	50.0156	55.151	57.423	31.8083	27.4199	24.5876	18.394	20.666	21.2885
10	97.1366	95.7948	100.472	24.6187	25.3657	23.187	25.0545	22.0666	21.3196	12.1382	17.4914	15.2505
15	96.6075	97.8656	100.504	20.5416	13.6321	18.2384	9.15033	8.15437	10.5198	4.17056	4.07719	4.97977

## Sheet: Figure  6B
Deacylation of N-propyl-D-Tyr-tRNATyr with Kn DTD2
Time	Buffer			KnDTD2 500 nM
0	100	100	100	100	100	100
2	100	96.3398	91.1335	53.7972	49.2052	54.6803
5	98.3882	87.9113	86.8464	32.6033	19.4278	41.6814
10	98.086	92.1424	84.508	33.9456	27.4461	28.4352
15	85.3593	85.9637	86.4566	14.8358	14.1999	6.53479

## Sheet: Figure 6C
Deacylation of N-acetonyl-D-Tyr-tRNATyr with Kn DTD2
Time	Buffer			KnDTD2 5 nM			KnDTD2 50 nM
0	100	100	100	100	100	100	100	100	100
2	90.9545	98.0016	94.478	23.8565	24.6499	20.2684	10.5601	6.76779	10.7351
5	92.2693	96.5554	94.4123	24.0548	17.6779	11.3186	10.035	4.8133	6.21354
10	93.8207	88.2461	91.0334	14.9125	9.91832	10.3267	5.89265	4.49242	5.71762
15	92.3482	85.4588	88.9035	15.5192	6.00934	10.6	4.46324	6.21354	13.2439
