# Supplementary material for: A translation proofreader of archaeal origin imparts multi-aldehyde stress tolerance to land plants
Source: eLife. 2024 Feb 19;12:RP92827. doi: 10.7554/eLife.92827 (PMC10942605; doi:10.7554/eLife.92827)
Supplement: Figure 6—source data 2. [file elife-92827-fig6-data2.xlsx]

## Sheet: Figure 6 - supplement figure 1A
Deacylation of N-butryl-D-Tyr-tRNATyr with Kn DTD2
Time	Buffer			KnDTD2 500 nM
0	100	100	100	100	100	100
2	100	102.352	99.7906	107.678	96.0433	79.7456
5	97.5904	99.4836	96.5301	86.1517	64.7197	84.5031
10	96.5003	93.1153	92.9106	76.3542	63.7306	73.528
15	92.3121	89.8164	89.0817	56.3825	49.5525	43.6175

## Sheet: Figure 6 - supplement figure 1B
Deacylation of N-valeryl-D-Tyr-tRNATyr with Kn DTD2
Time	Buffer			KnDTD2 500 nM
0	100	100	100	100	100	100
2	100	100.935	102.162	93.0155	90.2619	92.6461
5	96.4205	88.2941	101.016	93.1833	98.724	99.3956
10	95.1306	86.456	105.144	92.8475	84.9899	101.679
15	88.1006	84.5856	86.6645	89.9261	93.3512	93.8214

## Sheet: Figure 6 - supplement figure 1C
Deacylation of N-Isovaleryl-D-Tyr-tRNATyr with Kn DTD2
Time	Buffer			KnDTD2 500 nM
0	100	100	100	100	100	100
2	87.2591	80.3775	95.7782	65.0413	64.8447	61.7774
5	96.3429	102.241	97.102	53.5981	60.5584	57.8057
10	87.2198	83.9166	90.0537	67.3614	60.4798	56.4687
15	90.641	80.1809	103.363	64.766	41.6831	52.1431
