# Supplementary material for: A translation proofreader of archaeal origin imparts multi-aldehyde stress tolerance to land plants
Source: eLife. 2024 Feb 19;12:RP92827. doi: 10.7554/eLife.92827 (PMC10942605; doi:10.7554/eLife.92827)
Supplement: Supplementary file 2. [file elife-92827-supp2.xlsx]

## Sheet: Sheet1
List of primers used in the study
Gene name	Primer	Sequence
At DTD2 N-His	FP	5' CCGCGCGGCAGCCATATGATGGTAACACTAATCGTGGCCA 3'
	RP	5' GTGGTGGTGGTGCTCGAGT TCATGTGAAATCGTTTGGCTTCC 3'
At DTD1 C-His	FP	5' TTAACTTTAAGAAGGAGATATACATATGATGAGAGCTGTAATCCAAAGAGT 3'
	RP	5' GTGGTGGTGCTCGAGTGCCTTGGTGGATTGAGGTGAGTC 3'
Pho DTD2 no tag	FP	5' TTTAAGAAGGAGATATACCATGGGCATGAAGGTCATAATGACGACTAAG 3'
	RP	5' CTCGAGTGCGGCCGCAAGCTTTTAATCCTTTATGAATTCCAAACCAAGTTC 3'
Ec PTH N-His	FP	5' CCGCGCGGCAGCCATATGATGACGATTAAATTGATTGTCG 3'
	RP	5' GTGGTGGTGGTGCTCGAGTTTATTGCGCTTTAAAGGCGTG 3'
St PTH N-His	FP	5' CGGCAGCCATATGGCTAGCATGGCTACTAAAATGGTAATAGTCGTAAGGAC 3'
	RP	5' CTCGAGTGCGGCCGCAAGCTTTTAAAGAAGTTTTAGATCTCCAGTTATCTTATCAAC 3'
At tRNAPhe	FP	5' GCGGGGATAGCTCAGTTGGGAGAGCGTCAGACTGAAGATCTGAAGGTCGCGTGTTCGATCCACGCTCACCGCACCA 3'
	RP	5' TGGTGCGGTGAGCGTGGATCGAACACGCGACCTTCAGATCTTCAGTCTGACGCTCTCCCAACTGAGCTATCCCCGC 3'
At tRNATyr	FP	5' CCGACCTTAGCTCAGTTGGTAGAGCGGAGGACTGTAGATCCTTAGGTCACTGGTTCGAATCCGGTAGGTCGGACCA 3'
	RP	5' TGGTCCGACCTACCGGATTCGAACCAGTGACCTAAGGATCTACAGTCCTCCGCTCTACCAACTGAGCTAAGGTCGG 3'
Pho tRNATyr	FP	5' CCCGCGGTAGCCTAGCCTGGGAGTGGCGGCGGACTGTAGATCCGCAGGTCCCCGGTTCAAATCCGGGCCGCGGGACCA 3'
	RP	5' TGGTCCCGCGGCCCGGATTTGAACCGGGGACCTGCGGATCTACAGTCCGCCGCCACTCCCAGGCTAGGCTACCGCGGG 3'
Ec tRNAAla	FP	5' GGGGCTATAGCTCAGCTGGGAGAGCGCTTGCATGGCATGCAAGAGGTCAGCGGTTCGATCCCGCTTAGCTCCACCA 3'
	RP	5' TGGTGGAGCTAAGCGGGATCGAACCGCTGACCTCTTGCATGCCATGCAAGCGCTCTCCCAGCTGAGCTATAGCCCC 3'
DTD2 T-DNA insertion line	LP	5' GACATATTCGGCTCATAATTTCAG 3’
(SAIL_588_B09)	RP	5' TCAACCAAAACATCCTTCAGG 3’
	LB	5' GCCTTTTCAGAAATGGATAAATAGCCTTGCTTCC 3’
AtDTD2 (RT-PCR)	Forward primer	5’- ACGCCAATAATCGCGTTACAGTAACAACTCG -3’
	Reverse primer	5’- TGTGAAATCGTTTGGCTTCCC -3’
At DTD2 (RT-qPCR)	FP	5' TGTTCATCCGATTGGAGTGCTTC 3’
	RP	5' ACCAATTCTAGTGCTTGGCAACG 3’
EF-Tu (RT-PCR)	Forward primer	5’- TCTGCCGCAGGTGAATCAAAGG -3’
	Reverse primer	5’- ACACAGACACGCGACCAAATACC -3’
Actin2 (AT3G18780) RT-qPCR	FP	5' TCTTCCGCTCTTTCTTTCCAAGC 3’
	RP	5' ACCATTGTCACACACGATTGGTTG 3’
At DTD2 genomic DNA with promotor	FP	5' GTAGTGGTTATCACGTTTGCC 3’
	RP	5' TCATGTGAAATCGTTTGGCTTCCCAACAT 3’
At DTD2 H150A	FP	5' CATTGGAAGCTACTGCTCATGGACCAATAACTAACAAG 3’
	RP	5' GTTAGTTATTGGTCCATGAGCAGTAGCTTCCAATGTTATC 3’
At DTD2 cDNA	FP	5' ATGATTTTGAAAATAAGCGGCCG 3’
	RP	5' TCATGTGAAATCGTTTGGCTTCCCAACAT 3’
