# Supplementary figures and images for: A translation proofreader of archaeal origin imparts multi-aldehyde stress tolerance to land plants
Source: eLife journal article supplement (doi:10.7554/elife.92827), 2023-11-24

Source data used in figure 4A

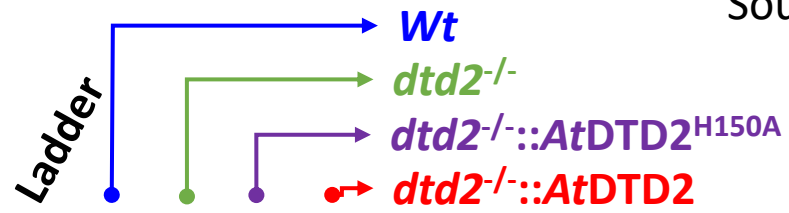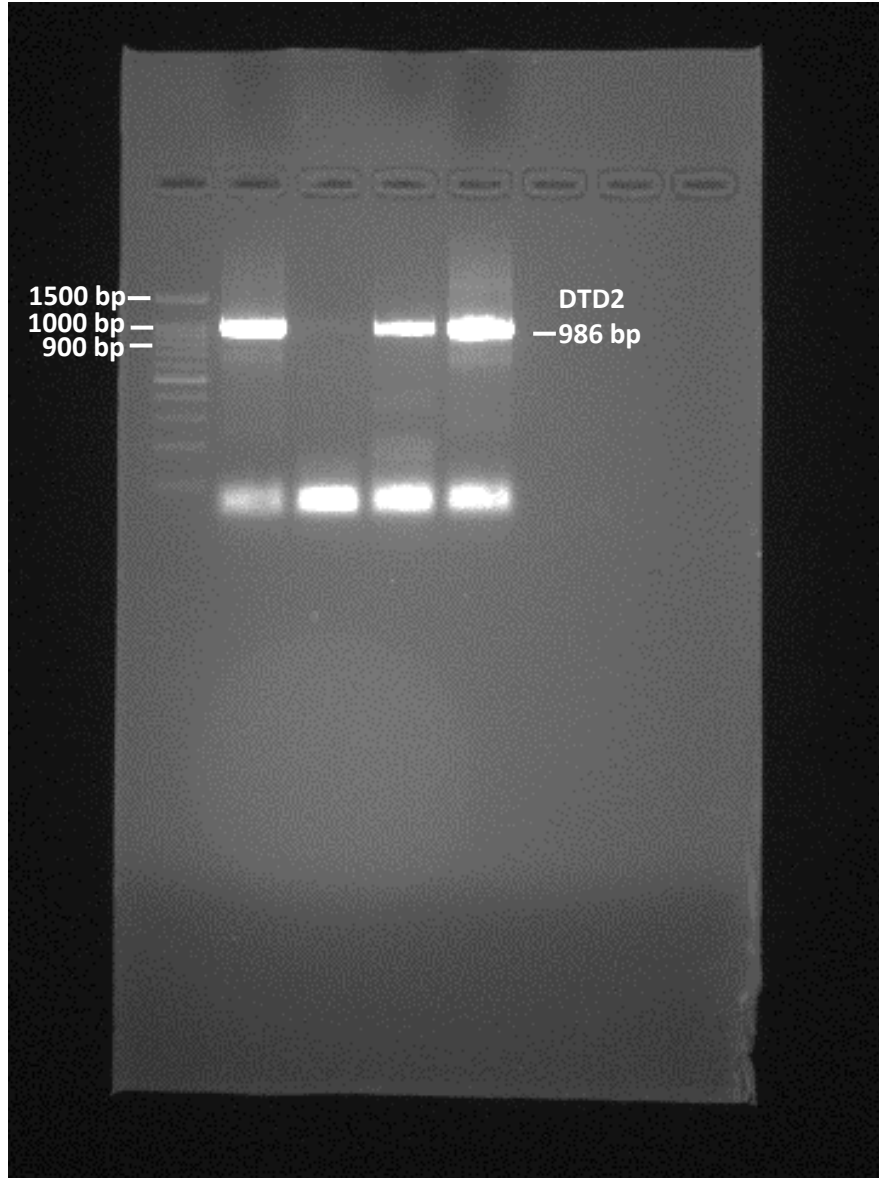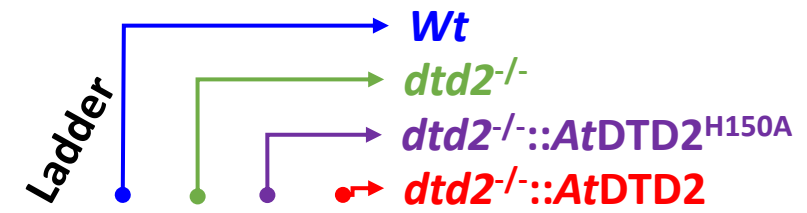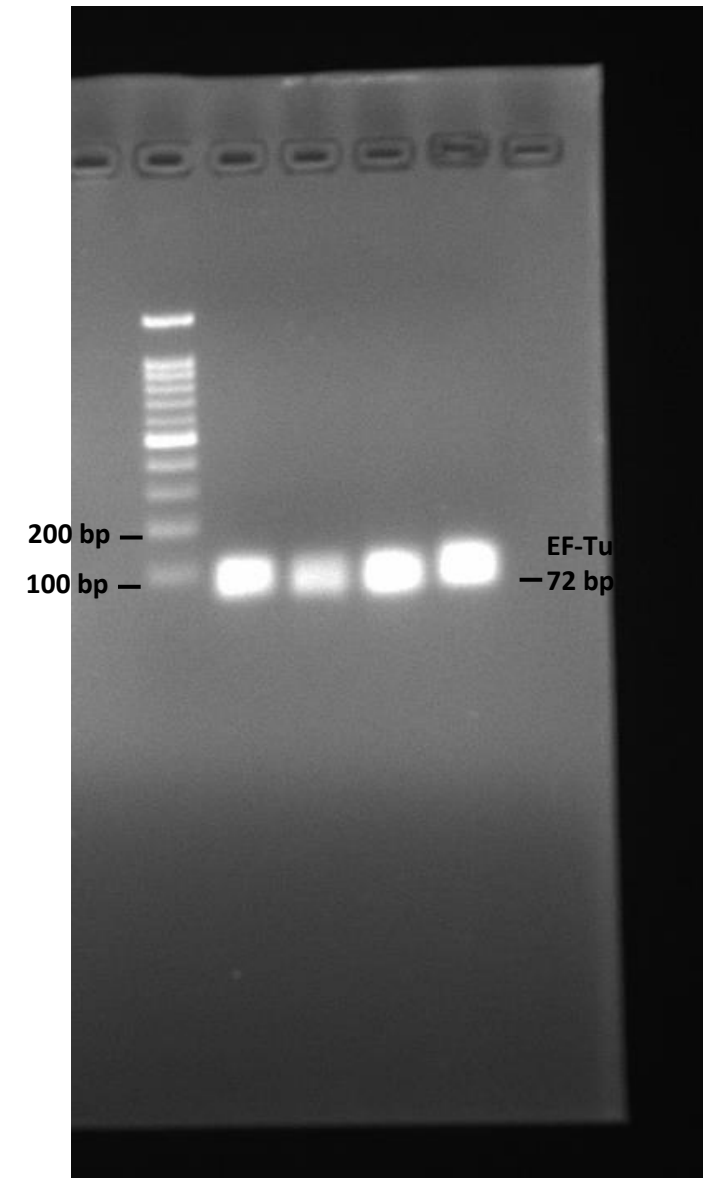

Supplement: fig4-data4 [file elife-92827-fig4-data4-v1.zip]
